# Supplementary material
Source: ML conference proceedings conference paper supplement (https://openreview.net/forum?id=HlbUkwLs9l9)

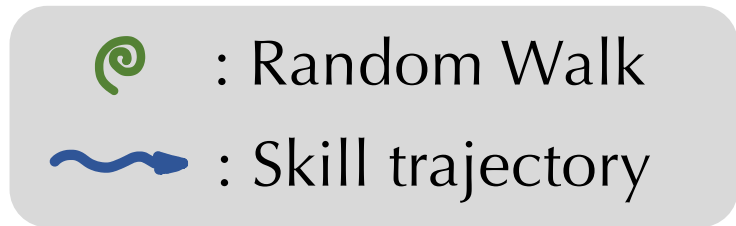

(a) Train  $\varphi$  on random walk trajectories

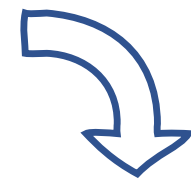

(b) Use the learned  $\varphi$  to train skills to travel across the explored area

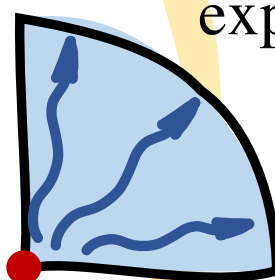

(c) Use skills to discover new regions and update  $\varphi$

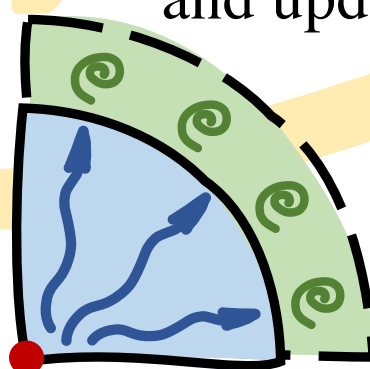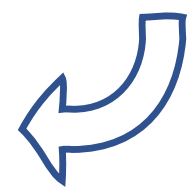

(d) Using the updated  $\varphi$ , extend the skills to cover the newly discovered area

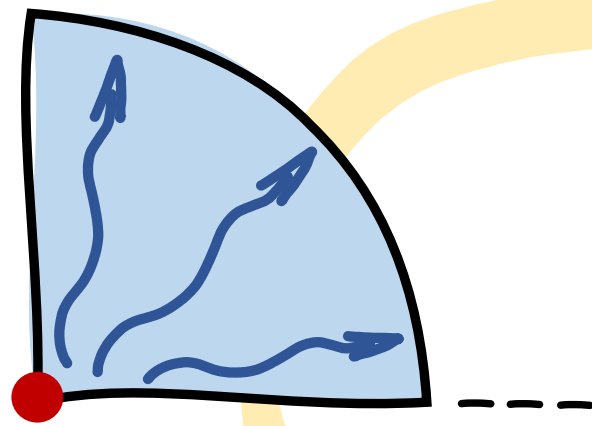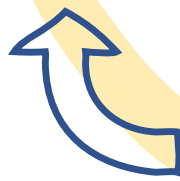

Supplement: supplementary_material [file attachment]
